# Supplementary material for: Legionella pneumophila Presence in Dental Unit Waterlines: A Cultural and Molecular Investigation in the West Bank, Palestine
Source: MDPI journal article supplement (doi:10.3390/tropicalmed8110490), 2023-10-30
Supplement: s1 [file s1]

## Supplementary materials

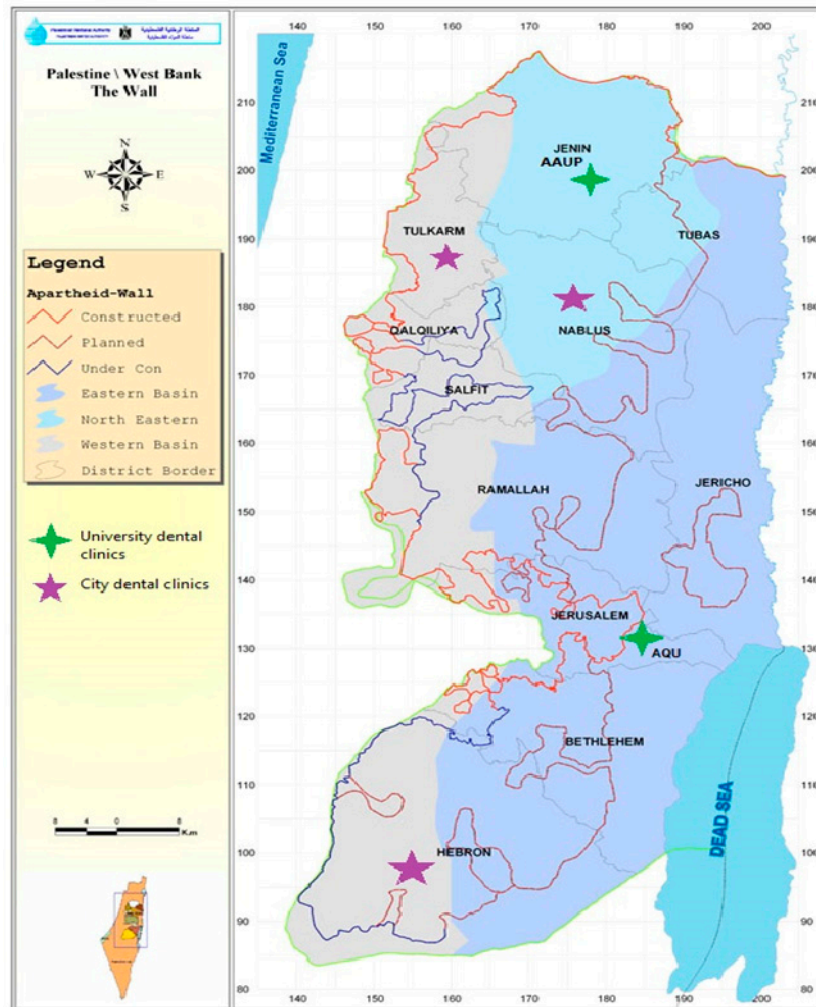

**Figure S1:** Sampling sites in the West Bank; Al-Quds University (AQU), Faculty of Dentistry in Abu Deis, East Jerusalem, and Arab American University in Jenin (AAUP), Faculty of Dentistry, and Dentists clinics in Nablus, Tulkarem, and Hebron. (Map adapted from Palestinian water authority PWA 2019).

**Table S1. Sequence identity of 16S rRNA sequenced isolates**

| <b>Isolate name</b> | <b>Accession No.</b> | <b>Database match with accession no.in parentheses</b>                              | <b>%Identity</b> |
|---------------------|----------------------|-------------------------------------------------------------------------------------|------------------|
| AQU1_TW_Ps          | SAMN368 86996        | <i>Legionella pneumophila</i> strain A194 chromosome (CP114578.1)                   | 97.91            |
| AQU2_DUWL_Ps        | SAMN368 86997        | <i>Legionella pneumophila</i> 130b chromosome, complete genome (CP115860.1)         | 94.54            |
| AQU3_TB_Ps          | SAMN368 86998        | <i>Legionella pneumophila</i> strain A194 chromosome (CP114578.1)                   | 95.46            |
| AQU4_DUB_Ps         | SAMN368 86999        | <i>Legionella pneumophila</i> strain SG1-QSBC08 chromosome (CP115861.1)             | 94.98            |
| N1_TW_Ps            | SAMN368 87000        | <i>Legionella pneumophila</i> subsp. pneumophila str. Philadelphia 1 (AE017354.1)   | 97.03            |
| N2_TB_Ps            | SAMN368 87001        | <i>Legionella pneumophila</i> strain OLDA, complete genome (CP016030.2)             | 96.83            |
| N3_DUB_Ps           | SAMN368 87002        | <i>Legionella pneumophila</i> strain A194 chromosome (CP114578.1)                   | 98.16            |
| T1_TW_Ps            | SAMN368 87003        | <i>Legionella pneumophila</i> str. Paris complete genome (CR628336.1)               | 98.15            |
| T2_DUWL_Ps          | SAMN368 87004        | <i>Legionella pneumophila</i> 130b chromosome, complete genome (CP115860.1)         | 97.99            |
| T3_TB_Ps            | SAMN368 87005        | <i>Legionella pneumophila</i> str. Paris complete genome (CR628336.1)               | 97.06            |
| T4_DUB_Ps           | SAMN368 87006        | <i>Legionella pneumophila</i> 130b chromosome, complete genome (CP115860.1)         | 97.82            |
| G1_TW_Ps            | SAMN368 87007        | <i>Legionella pneumophila</i> str. Paris complete genome (CR628336.1)               | 98.26            |
| G2_DUWL_Ps          | SAMN368 87008        | <i>Legionella pneumophila</i> strain A194 chromosome (CP114578.1)                   | 98.27            |
| G3_TB_Ps            | SAMN368 87009        | <i>Legionella pneumophila</i> strain AUSMDU00010536 isolate chromosome (CP045974.1) | 97.35            |
| G4_DUB_Ps           | SAMN368 87010        | <i>Legionella pneumophila</i> strain A194 chromosome (CP114578.1)                   | 96.12            |
